# Supplementary material
Source: publisher figshare collection journal article supplement (https://acs.figshare.com/ndownloader/files/9528388)
Supplement: Supplementary file 1 [file 9528388]

WHCp(CO)3
18
	Energy: -377239.2449624
W         -0.03380       -0.00001       -0.12246
O         -1.65234       -2.54459       -1.04055
O         -2.21368        0.00026        2.16902
O         -1.65233        2.54435       -1.04111
C         -1.08884       -1.59856       -0.68962
C         -1.42010        0.00016        1.32871
C         -1.08885        1.59838       -0.69000
C          2.23226       -0.00056       -0.87945
C          2.03917        1.15186       -0.06913
C          1.72794        0.71641        1.25035
C          1.72786       -0.71533        1.25106
C          2.03907       -1.15213       -0.06796
H          2.48304       -0.00110       -1.93060
H          2.13066        2.17805       -0.39628
H          1.56256        1.35465        2.10668
H          1.56240       -1.35270        2.10801
H          2.13044       -2.17866       -0.39409
H         -0.35456       -0.00026       -1.82434

dimethyl fumarate
18
	Energy: -335203.5227841
C          0.55534        0.36762       -0.00000
H          0.51033        1.45178       -0.00000
C         -0.55534       -0.36762       -0.00000
H         -0.51033       -1.45178       -0.00000
C          1.89031       -0.28495       -0.00000
O          2.08218       -1.48130        0.00000
O          2.86554        0.63015        0.00000
C         -1.89031        0.28495       -0.00000
O         -2.08218        1.48130        0.00000
O         -2.86554       -0.63015        0.00000
C          4.19732        0.11035        0.00000
H          4.36910       -0.49977       -0.88937
H          4.36910       -0.49977        0.88937
H          4.85334        0.97889        0.00000
C         -4.19732       -0.11035        0.00000
H         -4.36910        0.49977        0.88937
H         -4.85334       -0.97889        0.00000
H         -4.36910        0.49977       -0.88937

W[CH(CO2Me)(CH2CO2Me)]Cp(CO)3
36
	Energy: -712467.0200788
W         -0.79122       -0.55375       -0.00001
O         -1.74521        0.93344        2.62643
O         -1.97200       -2.86266        1.81594
O          1.74695       -2.32632        0.62413
C         -1.34804        0.41766        1.67599
C         -1.53837       -2.01872        1.15788
C          0.83542       -1.64085        0.44309
C         -2.09810        0.66997       -1.53409
C         -0.85875        0.42215       -2.19219
C         -0.70032       -0.97646       -2.34776
C         -1.84820       -1.60959       -1.78948
C         -2.72208       -0.58852       -1.29526
H         -2.50434        1.64347       -1.29946
H         -0.15273        1.18681       -2.48582
H          0.13677       -1.47407       -2.81710
H         -2.04405       -2.67266       -1.78308
H         -3.69471       -0.74477       -0.85066
C          0.88806        1.09145        0.17793
H          1.19490        1.11168        1.22438
C          0.29326        2.41988       -0.14480
O          0.38672        3.00460       -1.21143
O         -0.38709        2.94546        0.88979
C         -1.03032        4.19336        0.64586
H         -1.75919        4.10301       -0.16392
H         -0.30018        4.96027        0.37867
H         -1.53135        4.45349        1.57695
C          2.12555        0.82854       -0.68803
H          1.93836        0.17479       -1.54356
H          2.49144        1.77053       -1.11666
C          3.27268        0.25154        0.10959
O          3.42683        0.36563        1.30487
O          4.13898       -0.39130       -0.68549
C          5.27404       -0.95582       -0.02596
H          5.86575       -1.42888       -0.80811
H          4.95541       -1.69522        0.71195
H          5.85534       -0.17850        0.47486

4-Me
50
	Energy: -1040078.0555837
Pd         0.09031        0.06880       -0.01734
P          1.77076        1.69755       -0.30262
C          3.51257        1.13016       -0.34661
H          4.19794        1.97728       -0.44589
H          3.64604        0.45801       -1.19856
H          3.74061        0.57138        0.56304
C          1.77310        2.95471        1.03186
H          2.55283        3.70539        0.87130
H          1.93079        2.46315        1.99462
H          0.79697        3.44507        1.05384
C          1.65355        2.71978       -1.81959
H          2.46832        3.44869       -1.86666
H          0.69434        3.24254       -1.81908
H          1.69764        2.07069       -2.69779
C         -1.42974        1.11701       -1.16158
H         -1.02594        1.39444       -2.12954
C         -1.85579       -0.19225       -0.92429
H         -2.58123       -0.41003       -0.14758
C         -0.22821       -1.66787        1.20747
C          1.12855       -1.32943        1.28616
C         -1.63006       -1.22810       -1.96323
C         -1.94384        2.20629       -0.29622
O         -2.66442        2.06752        0.67004
O         -1.06420       -1.04983       -3.02344
O         -1.49795        3.40846       -0.70914
O         -2.11648       -2.41628       -1.57606
C         -1.91414        4.52280        0.08209
H         -1.45956        5.39819       -0.37899
H         -1.57117        4.41154        1.11365
H         -3.00236        4.61163        0.07832
C         -1.83857       -3.50864       -2.45426
H         -2.24077       -3.31498       -3.45073
H         -2.32429       -4.37492       -2.00828
H         -0.76043       -3.67003       -2.52358
C          2.11517       -2.10103        0.49567
O          1.86287       -2.86394       -0.41446
C         -1.15309       -1.18232        2.26251
H         -0.56428       -2.49125        0.58523
H          1.50149       -0.80312        2.15873
O         -0.84340       -0.46760        3.19489
O         -2.40602       -1.61205        2.04649
O          3.36869       -1.85253        0.91619
C          4.40428       -2.50099        0.17849
H          5.33782       -2.19740        0.64984
H          4.38551       -2.18472       -0.86751
H          4.28921       -3.58583        0.22339
C         -3.40095       -1.05733        2.91012
H         -3.47011        0.02130        2.75069
H         -3.16157       -1.25754        3.95625
H         -4.33479       -1.54335        2.63217

Complex A
32
	Energy: -704840.7874243
Pd         0.03934       -0.72115        0.32609
P         -2.21015       -1.15568       -0.06327
C         -2.64756       -1.80715       -1.72466
H         -2.18154       -2.78500       -1.86828
H         -2.25909       -1.12934       -2.48853
H         -3.73172       -1.90267       -1.84165
C         -3.23514        0.36575        0.03360
H         -3.16811        0.77960        1.04306
H         -4.28312        0.16277       -0.20797
H         -2.83116        1.10366       -0.66378
C         -3.11958       -2.30557        1.04796
H         -3.04106       -1.95341        2.07953
H         -2.67247       -3.30128        0.99064
H         -4.17630       -2.37177        0.77072
C          1.90239        0.36514        0.36060
H          2.11335        0.66345        1.38362
C          0.93394        1.04885       -0.38693
H          0.95842        1.00938       -1.47265
C          2.92424       -0.44545       -0.32935
O          2.99010       -0.65435       -1.52563
C          0.17785        2.17583        0.21551
O          0.29508        2.59402        1.34860
O          3.80276       -0.96492        0.55059
O         -0.68754        2.70116       -0.67353
C          4.81672       -1.79365       -0.01413
H          5.43466       -2.11739        0.82223
H          5.41659       -1.23380       -0.73535
H          4.37457       -2.65736       -0.51667
C         -1.49554        3.76868       -0.18047
H         -2.12865        3.42326        0.64094
H         -2.10873        4.08897       -1.02164
H         -0.87355        4.59341        0.17382

Complex B
50
	Energy: -1082108.3813399
Pd        -1.04177        0.12071        0.13471
P         -2.01576       -1.98808        0.59465
C         -1.48992        2.18429       -0.32128
H         -1.32633        2.36323       -1.37940
C         -2.65498        1.50818        0.09998
H         -3.02591        1.65402        1.11048
C         -2.68852       -2.77540       -0.92004
H         -3.18315       -3.72505       -0.69395
H         -1.87311       -2.94964       -1.62624
H         -3.40296       -2.09486       -1.38956
C         -0.94505       -3.30731        1.28758
H         -1.50109       -4.23829        1.43233
H         -0.53701       -2.97880        2.24675
H         -0.11084       -3.48920        0.60600
C         -3.45553       -1.99500        1.72991
H         -3.89133       -2.99463        1.82364
H         -4.20376       -1.29793        1.34421
H         -3.13632       -1.64499        2.71494
C         -3.63746        1.03725       -0.89901
C         -0.80110        3.09055        0.61374
O         -3.51469        1.07673       -2.10736
O         -1.03762        3.22538        1.79799
O          0.16781        3.79526       -0.01556
O         -4.73415        0.52660       -0.29808
C          0.86544        4.74024        0.79255
H          1.68167        5.11427        0.17541
H          1.25340        4.27113        1.70010
H          0.20369        5.56028        1.08156
C         -5.74271        0.03047       -1.17615
H         -6.09762        0.81913       -1.84287
H         -6.55067       -0.31524       -0.53291
H         -5.36122       -0.79620       -1.78111
H          0.27914       -0.09336       -1.00118
W          1.89836       -0.40780       -0.22619
C          2.54135       -1.97812        0.81784
O          2.91957       -2.89052        1.42315
C          0.78069       -0.25864        1.47940
O          0.46793       -0.16496        2.59839
C          1.30478       -1.90979       -1.39790
O          0.97217       -2.76772       -2.10103
H          2.88620        0.52802       -2.97148
C          3.02100        0.76900       -1.92642
C          3.98463        0.19007       -1.04675
H          1.47545        2.35649       -1.56378
H          4.72686       -0.54914       -1.31177
C          3.83298        0.81271        0.23322
H          4.43010        0.61592        1.11256
C          2.78500        1.77034        0.13368
H          2.42521        2.40349        0.93153
C          2.28714        1.74566       -1.19554

Complex C
50
	Energy: -1082103.6747491
Pd        -0.87538       -0.09295        0.02096
P         -1.75564       -1.93818        0.95477
C         -1.71808        2.12176       -0.43071
H         -1.99389        2.62896       -1.36142
C         -2.62887        0.98716       -0.08694
H         -3.13941        1.07927        0.86843
C         -2.51086       -3.07580       -0.25316
H         -2.89289       -3.96464        0.25749
H         -1.75848       -3.36287       -0.98970
H         -3.33229       -2.56247       -0.75559
C         -0.55184       -2.96126        1.86636
H         -1.05212       -3.83888        2.28578
H         -0.10849       -2.37046        2.66982
H          0.24275       -3.27691        1.18840
C         -3.08407       -1.60731        2.16155
H         -3.41566       -2.54124        2.62430
H         -3.92197       -1.13801        1.64170
H         -2.71489       -0.92834        2.93330
C         -3.47750        0.50169       -1.19419
C         -1.50967        3.11191        0.69699
O         -3.30054        0.73393       -2.37507
O         -2.17342        3.17497        1.70338
O         -0.47522        3.91740        0.43157
O         -4.48935       -0.27087       -0.74732
C         -0.15888        4.87967        1.44517
H          0.69619        5.43489        1.06427
H          0.09580        4.37397        2.37856
H         -1.00569        5.54740        1.61339
C         -5.34165       -0.81315       -1.75832
H         -5.82169       -0.01340       -2.32564
H         -6.08789       -1.40372       -1.22900
H         -4.77279       -1.44362       -2.44637
H         -0.66582        1.75035       -0.70027
W          1.97944       -0.28064       -0.18896
C          2.97388       -1.75293        0.65066
O          3.58362       -2.61857        1.14104
C          1.20394       -0.08057        1.61683
O          0.86428        0.08895        2.72791
C          0.95327       -1.73529       -1.03857
O          0.47128       -2.62887       -1.63055
H          3.11998       -0.14520       -3.06762
C          3.01673        0.49521       -2.20297
C          3.95583        0.63192       -1.14786
H          1.05126        1.50364       -2.55758
H          4.89970        0.11023       -1.07055
C          3.45229        1.58534       -0.21822
H          3.95235        1.92524        0.67752
C          2.18381        2.03101       -0.69664
H          1.55099        2.77660       -0.23392
C          1.91570        1.35807       -1.92421

Complex D
50
	Energy: -1082103.9497990
Pd         0.69007        0.60575        0.53253
P          2.13333        1.66195        2.04136
W         -1.65518       -0.00267       -0.66318
C         -1.32910       -0.33468        1.27552
C         -0.29105        1.21451       -1.46649
C          2.24860        3.46737        1.74427
C          1.49643        1.53754        3.75261
C          3.87760        1.14084        2.20822
C         -2.71741        1.58936       -0.14226
C         -1.37681       -1.93314       -2.00902
C         -2.02523       -0.94873       -2.81093
C         -3.29061       -0.66707       -2.23373
C         -3.43742       -1.47879       -1.06481
C         -2.24827       -2.25839       -0.93165
C          2.06890       -0.88152        0.10946
C          1.56305       -2.24000        0.55969
C          1.39013       -2.31918        2.05646
C          2.28369       -0.80811       -1.36705
O          3.07007        0.22969       -1.69622
O          0.45254       -3.20596        2.39264
C          0.18758       -3.33084        3.79264
C          3.26419        0.44102       -3.09535
O         -1.33473       -0.66421        2.40270
O          0.37635        1.88970       -2.15968
O          2.03574       -1.68857        2.86966
O          1.84020       -1.58342       -2.19371
O         -3.37953        2.50176        0.14189
H          3.00243       -0.63769        0.61240
H          0.62931       -2.50969        0.06740
H          1.24327        3.89535        1.72032
H          0.47234        1.91681        3.78867
H          2.71953        3.64379        0.77430
H          1.48991        0.48269        4.03559
H          4.38530        1.22247        1.24367
H          3.89502        0.09960        2.53911
H          2.29699       -3.01392        0.28742
H         -0.37863       -2.31877       -2.17348
H          2.30860        0.64824       -3.58036
H         -1.61808       -0.49535       -3.70391
H          2.83195        3.95950        2.52845
H          2.12180        2.10733        4.44668
H          4.39382        1.76485        2.94313
H          3.92077        1.30605       -3.17291
H         -0.18969       -2.38402        4.18325
H          3.72772       -0.43341       -3.55709
H         -2.04908       -2.98212       -0.15279
H         -4.02297        0.02808       -2.61977
H         -4.30593       -1.52325       -0.42368
H          1.09271       -3.61745        4.33200
H         -0.57115       -4.10641        3.87982

Complex E
50
	Energy: -1082105.9749980
Pd         0.22027        1.60984        0.91104
P          1.58549        2.10148        2.75671
W         -1.01614        0.02542       -0.95994
C         -0.80711       -0.13441        1.13686
C          0.23868        1.23803       -1.96649
C          1.55779        3.77986        3.50557
C          1.28220        1.00750        4.19486
C          3.37254        1.82562        2.44396
C         -1.71489        1.84953       -0.42887
C         -1.67234       -2.07385       -1.90711
C         -1.73628       -1.06055       -2.90229
C         -2.72269       -0.11015       -2.49647
C         -3.24489       -0.53907       -1.23396
C         -2.59027       -1.75431       -0.87727
C          0.96276       -1.25680       -0.69235
C          0.82950       -2.48127        0.21919
C          1.39923       -2.27176        1.60157
C          1.44400       -1.65334       -2.03819
O          2.19649       -0.69575       -2.61731
O          0.97651       -3.23005        2.43551
C          1.45272       -3.15007        3.77807
C          2.60119       -0.94439       -3.95931
O         -1.04712       -0.65746        2.16248
O          0.85862        1.96781       -2.61513
O          2.16251       -1.39099        1.94059
O          1.21299       -2.71023       -2.60585
O         -2.25187        2.87337       -0.26587
H          1.69242       -0.56988       -0.26401
H         -0.19799       -2.83183        0.34695
H          0.54560        4.00786        3.84890
H          0.24358        1.10103        4.51950
H          1.83924        4.52193        2.75420
H          1.45589       -0.01844        3.86256
H          3.71797        2.49587        1.65301
H          3.49896        0.79291        2.11027
H          1.37078       -3.33605       -0.20737
H         -0.98908       -2.91130       -1.92966
H          1.73137       -1.04910       -4.61361
H         -1.16186       -1.04197       -3.81737
H          2.24902        3.84522        4.35179
H          1.95358        1.24779        5.02523
H          3.96458        1.99637        3.34882
H          3.18922       -0.07705       -4.25595
H          1.02467       -2.27880        4.27977
H          3.20280       -1.85372       -4.02380
H         -2.76271       -2.32726        0.02327
H         -3.04277        0.75712       -3.05607
H         -4.02438       -0.05004       -0.66716
H          2.54224       -3.08167        3.80140
H          1.11674       -4.06331        4.26688

TS1
50
	Energy: -1082096.5195975
Pd        -0.94043        0.02521        0.06382
P         -1.95749       -1.95318        0.72625
C         -1.43500        2.14784       -0.25972
H         -1.36399        2.49823       -1.28734
C         -2.58251        1.38236        0.09997
H         -2.95921        1.45057        1.11571
C         -2.91661       -2.75493       -0.60829
H         -3.37170       -3.68639       -0.25940
H         -2.25241       -2.96007       -1.45036
H         -3.70058       -2.06967       -0.93738
C         -0.85360       -3.28021        1.32933
H         -1.42917       -4.16881        1.60393
H         -0.29809       -2.92184        2.19840
H         -0.13734       -3.53684        0.54609
C         -3.18001       -1.74607        2.07112
H         -3.62745       -2.70479        2.34945
H         -3.96070       -1.06277        1.72755
H         -2.68764       -1.30776        2.94241
C         -3.54945        1.02014       -0.95545
C         -0.84467        3.06223        0.77676
O         -3.40578        1.20545       -2.14741
O         -1.14804        3.08073        1.94619
O          0.08728        3.85319        0.23140
O         -4.64436        0.43450       -0.43102
C          0.76282        4.73219        1.13683
H          1.53229        5.22633        0.54663
H          1.20889        4.16454        1.95636
H          0.06523        5.46465        1.54733
C         -5.64919        0.05678       -1.37398
H         -6.02998        0.93422       -1.90073
H         -6.44135       -0.40908       -0.79007
H         -5.24850       -0.64828       -2.10643
H         -0.07133        1.29721       -0.42843
W          1.87533       -0.38687       -0.19547
C          2.60303       -2.13604        0.31706
O          3.05591       -3.16803        0.61509
C          1.12675       -0.47345        1.64353
O          0.81617       -0.51229        2.76920
C          0.68883       -1.51918       -1.31722
O          0.12805       -2.22788       -2.06140
H          2.47236        0.67300       -3.05398
C          2.78084        0.85451       -2.03383
C          3.83509        0.19253       -1.34875
H          1.44181        2.53184       -1.39494
H          4.47937       -0.57102       -1.76110
C          3.92002        0.74298       -0.03076
H          4.64310        0.47375        0.72580
C          2.91084        1.73959        0.08815
H          2.72327        2.35355        0.95788
C          2.21801        1.82045       -1.15374

TS2
50
	Energy: -1082094.3853185
Pd         0.87065        0.96404        0.29366
P          2.06388        1.93642        2.10660
W         -1.16385        0.05520       -1.18982
C         -0.89748        0.01727        0.85903
C         -0.04336        1.45896       -2.09023
C          1.99279        3.74937        2.40947
C          1.57037        1.24580        3.73354
C          3.87250        1.61331        2.09991
C         -2.21025        1.66529       -0.70387
C         -1.29190       -2.10449       -2.23053
C         -1.65308       -1.11717       -3.18412
C         -2.83170       -0.46539       -2.72199
C         -3.18697       -1.05055       -1.46197
C         -2.22711       -2.06143       -1.16301
C          1.54787       -0.93339       -0.72470
C          1.34830       -2.28172       -0.03893
C          1.45087       -2.18150        1.46294
C          1.83625       -1.06172       -2.17016
O          2.42542        0.04543       -2.66037
O          0.46209       -2.84597        2.06728
C          0.43649       -2.76629        3.49426
C          2.66321        0.05498       -4.06449
O         -1.14494       -0.22247        1.98374
O          0.50057        2.28751       -2.69500
O          2.32764       -1.59615        2.06472
O          1.64379       -2.05114       -2.85943
O         -2.88549        2.57598       -0.45952
H          2.43281       -0.44881       -0.28047
H          0.40438       -2.75949       -0.29156
H          0.95317        4.04997        2.56311
H          0.50260        1.41412        3.89256
H          2.37452        4.28077        1.53391
H          1.75272        0.16888        3.70518
H          4.32503        2.07133        1.21654
H          4.02177        0.53194        2.04801
H          2.14650       -2.96504       -0.36117
H         -0.41691       -2.73427       -2.30874
H          1.72202       -0.03830       -4.61292
H         -1.12744       -0.91590       -4.10684
H          2.58285        4.03113        3.28752
H          2.14188        1.69779        4.55047
H          4.35590        2.00786        2.99944
H          3.12508        1.01733       -4.27851
H          0.21154       -1.74262        3.80116
H          3.32710       -0.76254       -4.35352
H         -2.21961       -2.69105       -0.28387
H         -3.38137        0.30595       -3.24227
H         -4.05010       -0.79625       -0.86314
H          1.39427       -3.07672        3.91619
H         -0.35928       -3.43725        3.81291
